# Supplementary material
Source: PubMed Central journal article supplement (PMC3854115)

**Table S1. Derogatis Sexual Functioning Interview (DSFI)**

**Global Sexual Satisfaction Index (GSSI)**

|                                                                                                                      |   |                     |
|----------------------------------------------------------------------------------------------------------------------|---|---------------------|
| Record your personal evaluation of how satisfying your sexual relationship is.                                       |   |                     |
| Make your evaluation by placing a check in the appropriate box that best describes your present sexual relationship. |   |                     |
| <input type="checkbox"/>                                                                                             | 8 | Could not be better |
| <input type="checkbox"/>                                                                                             | 7 | Excellent           |
| <input type="checkbox"/>                                                                                             | 6 | Good                |
| <input type="checkbox"/>                                                                                             | 5 | Above average       |
| <input type="checkbox"/>                                                                                             | 4 | Adequate            |
| <input type="checkbox"/>                                                                                             | 3 | Somewhat inadequate |
| <input type="checkbox"/>                                                                                             | 2 | Poor                |
| <input type="checkbox"/>                                                                                             | 1 | Highly Inadequate   |
| <input type="checkbox"/>                                                                                             | 0 | Could not be worse  |

**Table S2. DISF-SR (Female Version)**

|                                                                                                                                                                                     |
|-------------------------------------------------------------------------------------------------------------------------------------------------------------------------------------|
| <b>SEXUAL COGNITION/ FANTASY</b>                                                                                                                                                    |
| <b>DURING THE PAST 30 DAYS, HOW OFTEN HAVE YOU HAD THOUGHTS, DREAMS OR FANTASIES ABOUT</b>                                                                                          |
| A sexually attractive person                                                                                                                                                        |
| Erotic parts of a man's body                                                                                                                                                        |
| Erotic or romantic situations                                                                                                                                                       |
| Caressing, touching, undressing, or foreplay                                                                                                                                        |
| Sexual intercourse, oral sex, touching to orgasm                                                                                                                                    |
| <b>SEXUAL AROUSAL</b>                                                                                                                                                               |
| <b>DURING THE PAST 30 DAYS, HOW OFTEN DID YOU HAVE THE FOLLOWING EXPERIENCE?</b>                                                                                                    |
| Feel sexually aroused while alone                                                                                                                                                   |
| Actively seek sexual satisfaction                                                                                                                                                   |
| Feel sexually aroused with a partner                                                                                                                                                |
| <b>SEXUAL BEHAVIOR/ EXPERIENCES</b>                                                                                                                                                 |
| <b>DURING THE PAST 30 DAYS, HOW OFTEN DID YOU ENGAGE IN THE FOLLOWING SEXUAL ACTIVITIES?</b>                                                                                        |
| Reading or viewing romantic or erotic books or stories                                                                                                                              |
| Masturbation                                                                                                                                                                        |
| Casual kissing and petting                                                                                                                                                          |
| Sexual foreplay                                                                                                                                                                     |
| Sexual intercourse, oral sex, etc.                                                                                                                                                  |
| <b>ORGASM</b>                                                                                                                                                                       |
| <b>DURING THE PAST 30 DAYS, HOW SATISFIED HAVE YOU BEEN WITH THE FOLLOWING</b>                                                                                                      |
| Ability to have an orgasm                                                                                                                                                           |
| Intensity of orgasm                                                                                                                                                                 |
| Ability to have multiple orgasms                                                                                                                                                    |
| Feelings of closeness/ togetherness with partner                                                                                                                                    |
| Sense of control (timing) of orgasm                                                                                                                                                 |
| Feeling a sense of relaxation/ well-being after orgasm                                                                                                                              |
| <b>DRIVE &amp; RELATIONSHIP</b>                                                                                                                                                     |
| Ideal frequency of sexual intercourse with partner of choice                                                                                                                        |
| How interested in sex?                                                                                                                                                              |
| How satisfied with personal relationship with sexual partner?                                                                                                                       |
| Quality of current sexual functioning?                                                                                                                                              |
| 8 = 4 or more per day; 7 = 2 or 3 per day; 6 = 1 per day; 5 = 4 to 6 per week; 4 = 2 or 3 per week; 3 = 1 per week; 2 = 1 or 2 per month; 1 = less than 1 per month; 0 = not at all |

**Table S3. DISF-SR (Male Version)**

|                                                                                                                                                                                     |
|-------------------------------------------------------------------------------------------------------------------------------------------------------------------------------------|
| <b>SEXUAL COGNITION/ FANTASY</b>                                                                                                                                                    |
| <b>DURING THE PAST 30 DAYS, HOW OFTEN HAVE YOU HAD THOUGHTS, DREAMS OR FANTASIES ABOUT</b>                                                                                          |
| A sexually attractive person                                                                                                                                                        |
| Erotic parts of a woman's body                                                                                                                                                      |
| Erotic or romantic situations                                                                                                                                                       |
| Caressing, touching, undressing, or foreplay                                                                                                                                        |
| Sexual intercourse, oral sex, touching to orgasm                                                                                                                                    |
| <b>SEXUAL AROUSAL</b>                                                                                                                                                               |
| <b>DURING THE PAST 30 DAYS, HOW OFTEN DID YOU HAVE THE FOLLOWING EXPERIENCE?</b>                                                                                                    |
| A full erection upon awakening                                                                                                                                                      |
| A full erection during a sexual fantasy or daydream                                                                                                                                 |
| A full erection while looking at a sexually arousing person, movie or picture                                                                                                       |
| A full erection during masturbation                                                                                                                                                 |
| A full erection throughout the phases of a normal sexual response cycle                                                                                                             |
| <b>SEXUAL BEHAVIOR/ EXPERIENCES</b>                                                                                                                                                 |
| <b>DURING THE PAST 30 DAYS, HOW OFTEN DID YOU ENGAGE IN THE FOLLOWING SEXUAL ACTIVITIES?</b>                                                                                        |
| Reading or viewing romantic or erotic books or stories                                                                                                                              |
| Masturbation                                                                                                                                                                        |
| Casual kissing and petting                                                                                                                                                          |
| Sexual foreplay                                                                                                                                                                     |
| Sexual intercourse, oral sex, etc.                                                                                                                                                  |
| <b>ORGASM</b>                                                                                                                                                                       |
| <b>DURING THE PAST 30 DAYS, HOW SATISFIED HAVE YOU BEEN WITH THE FOLLOWING</b>                                                                                                      |
| Ability to have an orgasm                                                                                                                                                           |
| Intensity of orgasm                                                                                                                                                                 |
| Length or duration of orgasm                                                                                                                                                        |
| Amount of seminal fluid that you ejaculate                                                                                                                                          |
| Sense of control (timing) of orgasm                                                                                                                                                 |
| Feeling a sense of relaxation/ well-being after orgasm                                                                                                                              |
| <b>DRIVE/ RELATIONSHIP</b>                                                                                                                                                          |
| Ideal frequency of sexual intercourse, with partner of your choice                                                                                                                  |
| How interested have you been in sex?                                                                                                                                                |
| How satisfied have you been with your personal relationship with your sexual partner?                                                                                               |
| What would represent the best description of the quality of your current sexual functioning?                                                                                        |
| 8 = 4 or more per day; 7 = 2 or 3 per day; 6 = 1 per day; 5 = 4 to 6 per week; 4 = 2 or 3 per week; 3 = 1 per week; 2 = 1 or 2 per month; 1 = less than 1 per month; 0 = not at all |

**Figure S1.** Flow chart of study enrollment and participation.

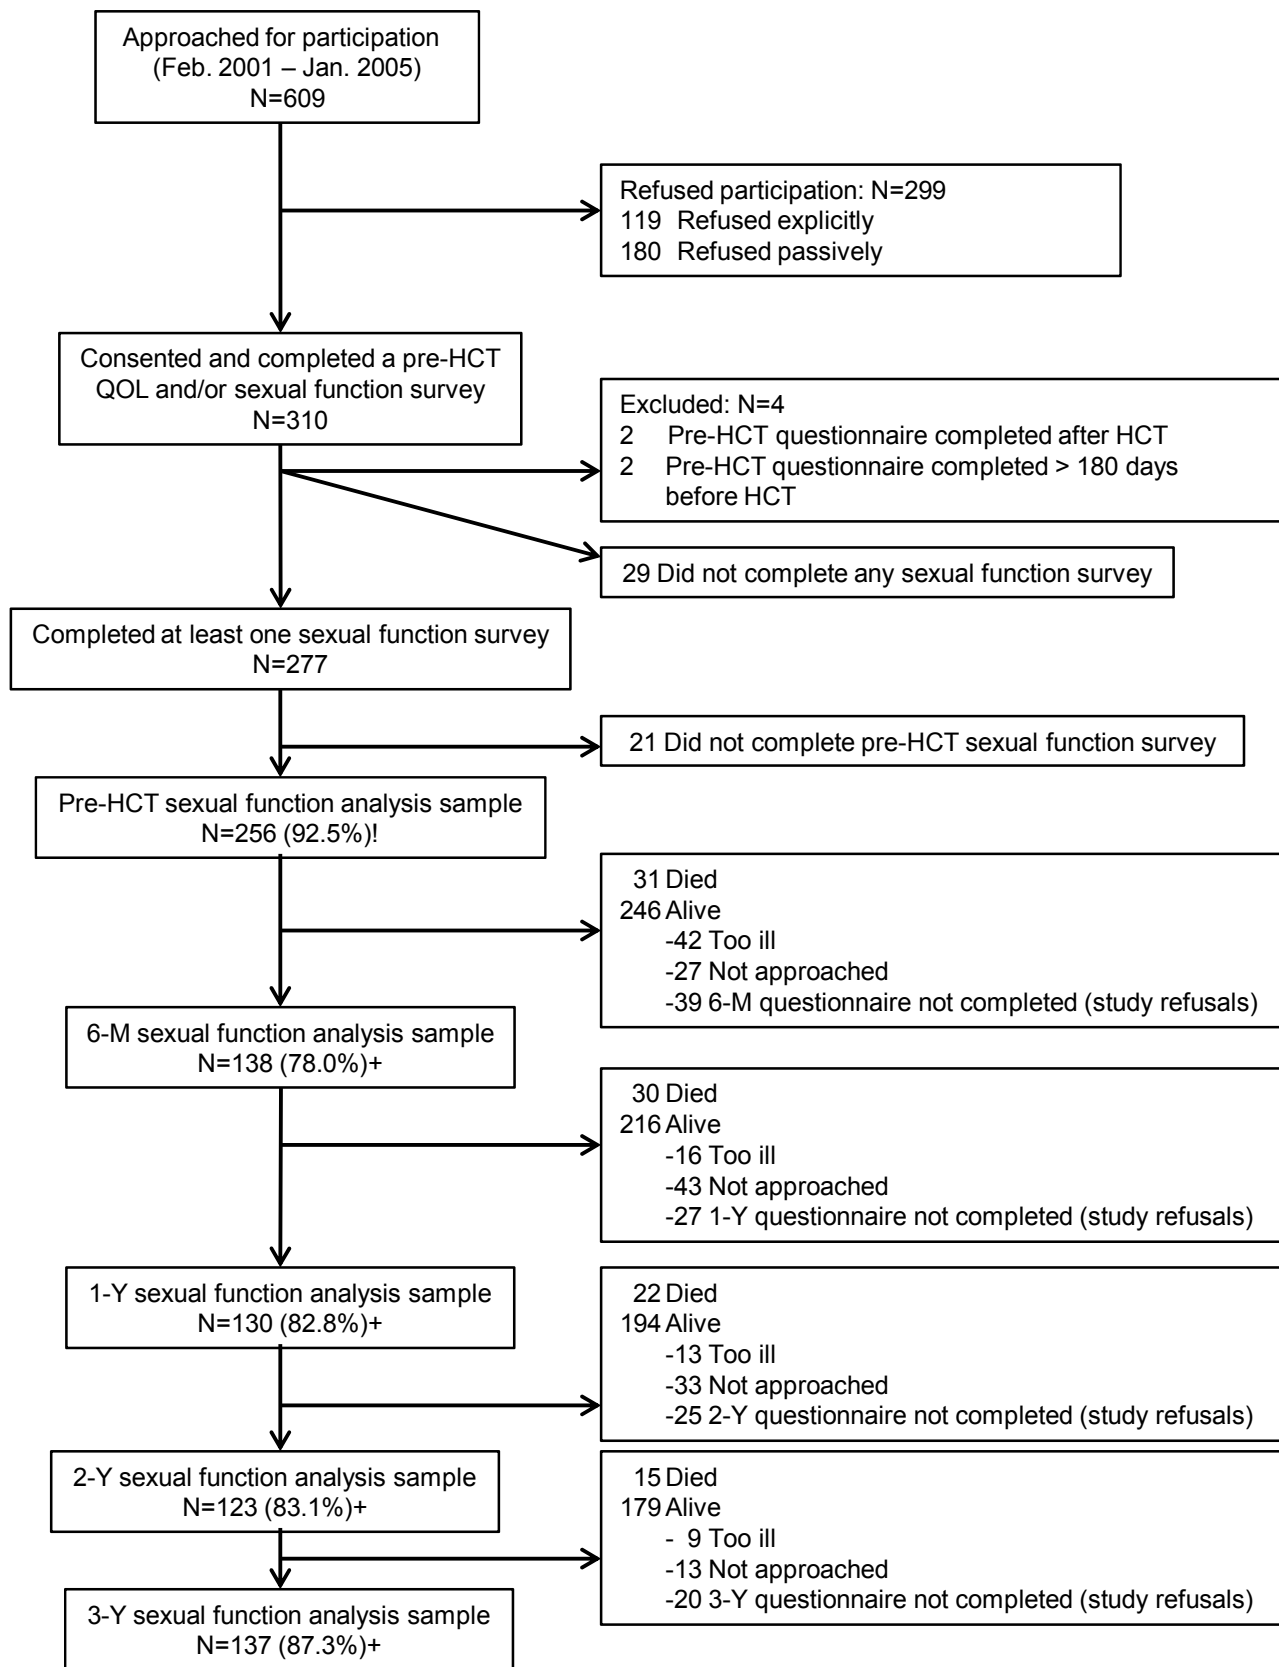

! Response rate at pre-HCT = 256/277 = 92.5%

+ Response rate post HCT = # in analysis / (# Alive - # Too ill - # Not approached) x 100

**Figure S2.** Predicted sexual function domain scores and total sexual function at age 34 years (men: dashed lines; women, solid lines;  $\pm 95\%$  confidence intervals), compared to the median sexual function scores from a normative community sample (Men:  $\square$ ; women:  $\circ$ ; mean age 34 years).

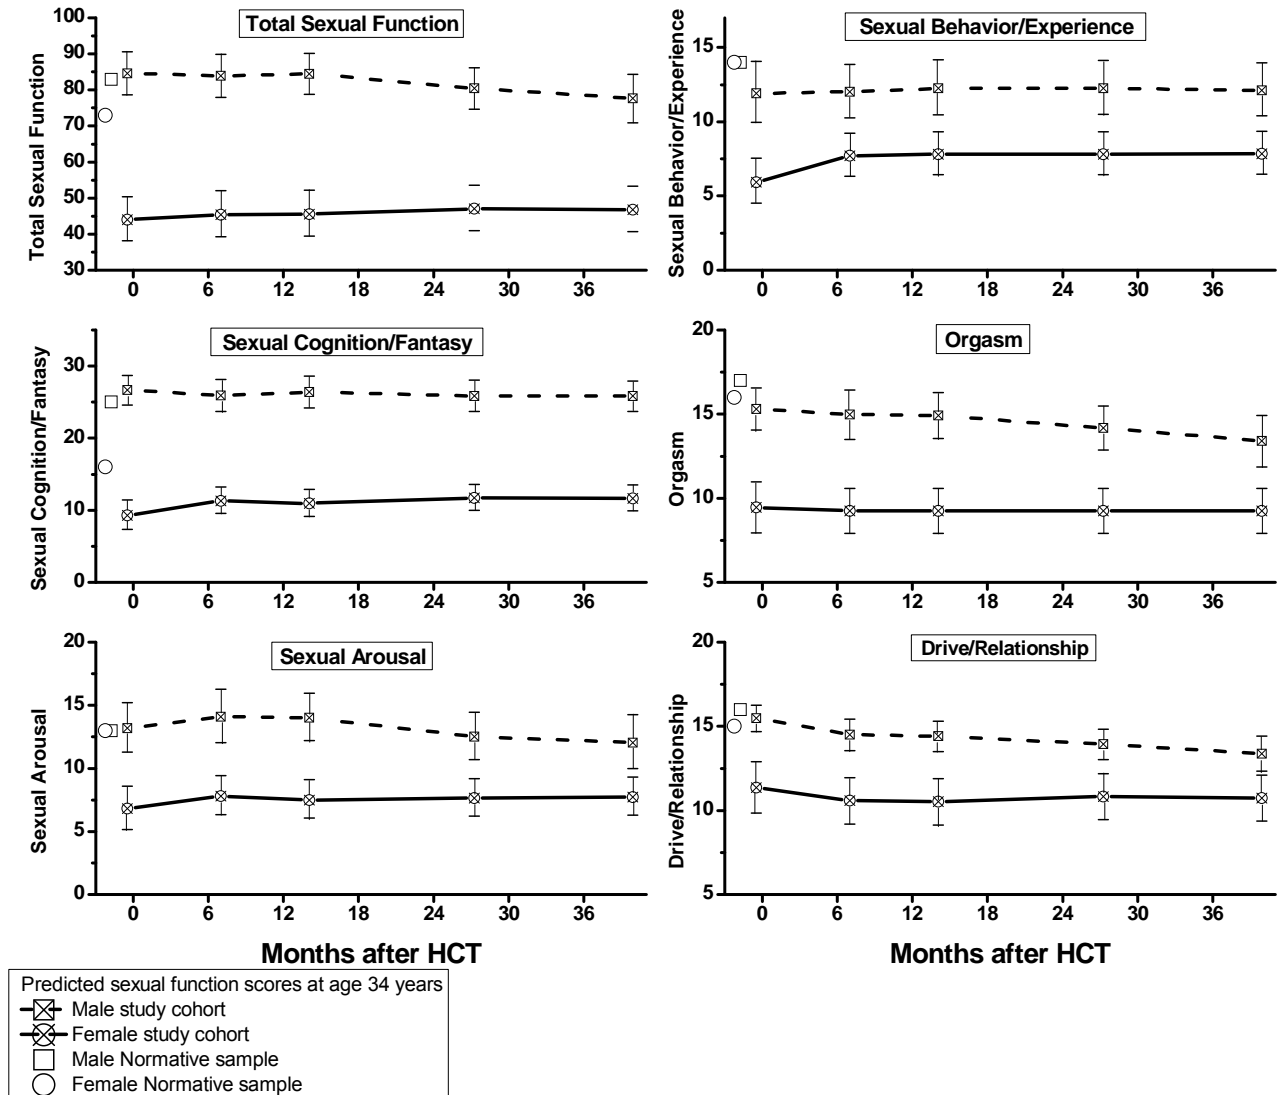

Supplement: supp_blood-2013-05-499806_blood-2013-05-499806-1.pdf [file supp_blood-2013-05-499806_blood-2013-05-499806-1.pdf]
